# Supplementary material for: Selection and characterization of ultrahigh potency designed ankyrin repeat protein inhibitors of C. difficile toxin B
Source: PLoS Biol. 2019 Jun 24;17(6):e3000311. doi: 10.1371/journal.pbio.3000311 (PMC6590788; doi:10.1371/journal.pbio.3000311)
Supplement: S1 Data — (XLSX) [file pbio.3000311.s028.xlsx]

## Sheet: Fig 1A
	DARPin	1.2E	% cell viability relative to naïve (CellTiterGlo)							DARPin	5.8 B	% cell viability relative to naïve (CellTiterGlo)							DARPin	3.5 B	% cell viability relative to naïve (CellTiterGlo)
			Experiment1		Experiment 2							Experiment1		Experiment 2							Experiment1		Experiment 2
		Concentration (nM)	Rep 1	Rep 2	Rep 1	Rep 2	Average	stdev			Concentration (nM)	Rep 1	Rep 2	Rep 1	Rep 2	Average	stdev			Concentration (nM)	Rep 1	Rep 2	Rep 1	Rep 2	Average	stdev
		Naïve	98.8199	101.18	104.517	95.483	100	3.81189			Naïve	99.743	100.257	99.8318	100.168	100	0.250777			Naïve	103.319	96.6809	100.907	99.0928	100	2.80947
		200	98.4541	99.6054	95.9599	91.1646	96.296	3.74405			200	99.6067	94.9603	90.4045	91.5785	94.1375	4.12604			200	98.4844	93.4865	100.04	105.596	99.4018	4.98713
		100	101.025	101.107	99.1693	94.0412	98.8356	3.31914			100	96.5701	96.06	89.2119	91.9846	93.4566	3.49551			100	88.7203	95.7741	95.3921	108.027	96.9783	8.0462
		20	99.5842	98.7648	97.073	94.3212	97.4358	2.3248			20	82.5523	78.0278	85.8498	87.6019	83.5079	4.21073			20	68.4168	72.2868	90.9129	92.497	81.0284	12.4459
		10	93.0636	90.9925	89.7796	88.8938	90.6824	1.80554			10	40.0235	55.3857	69.1824	64.2436	57.2088	12.7999			10	41.94	46.063	63.3601	71.7372	55.7751	14.1192
		5	79.2274	72.6888	84.5116	82.3392	79.6917	5.14769			5	28.6863	29.682	38.7159	39.5574	34.1604	5.77064			5	31.0005	35.007	43.9918	38.7329	37.183	5.52928
		1	31.6952	26.2438	41.1356	35.379	33.6134	6.26342			1	17.8988	19.6849	20.4061	19.6563	19.4116	1.0665			1	23.4979	24.2202	18.1112	24.7323	22.6404	3.06162
		0	12.4746	14.8653	16.1036	15.8352	14.8197	1.65137			0	15.8723	16.1994	18.8658	20.49	17.8569	2.20885			0	20.4823	15.9169	21.9917	22.7124	20.2758	3.05089
	DARPin	1.4 E	% cell viability relative to naïve (CellTiterGlo)							DARPin	5.5 A	% cell viability relative to naïve (CellTiterGlo)							DARPin	3.9G	% cell viability relative to naïve (CellTiterGlo)
			Experiment1		Experiment 2							Experiment1		Experiment 2							Experiment1		Experiment 2
		Concentration (nM)	Rep 1	Rep 2	Rep 1	Rep 2	Average	stdev			Concentration (nM)	Rep 1	Rep 2	Rep 1	Rep 2	Average	stdev			Concentration (nM)	Rep 1	Rep 2	Rep 1	Rep 2	Average	stdev
		Naïve	98.8199	101.18	104.517	95.483	100	3.81189			Naïve	99.743	100.257	99.8318	100.168	100	0.250777			Naïve	103.319	96.6809	100.907	99.0928	100	2.80947
		200	96.7946	98.8624	98.2119	98.5523	98.1053	0.913303			200	97.9858	93.9757	89.2776	91.7394	93.2446	3.69758			200	84.5344	86.4107	100.509	97.2739	92.182	7.89641
		100	99.4654	94.0017	97.6407	91.3239	95.6079	3.64895			100	89.0277	90.6448	93.4224	91.6079	91.1757	1.83758			100	72.055	68.2903	89.3918	86.4455	79.0456	10.4299
		20	93.2799	97.0138	94.8397	92.9322	94.5164	1.86013			20	79.9251	72.2749	83.2232	86.6177	80.5102	6.13257			20	42.1138	32.867	58.7675	48.0693	45.4544	10.8578
		10	86.3025	80.2142	84.8824	83.573	83.743	2.60325			10	42.0611	40.7244	61.1669	58.0098	50.4905	10.5981			10	26.1397	27.368	32.1702	36.7758	30.6134	4.86297
		5	78.2011	56.4468	76.8398	82.1195	73.4018	11.5228			5	33.9291	26.1998	43.9071	43.2853	36.8304	8.42956			5	24.2888	25.6704	27.8921	26.4209	26.068	1.50283
		1	24.6206	28.1654	31.3219	36.0375	30.0363	4.84757			1	16.5265	21.248	21.4708	22.1362	20.3454	2.57376			1	18.1254	21.5106	19.0207	18.191	19.2119	1.58571
		0	12.4746	14.8653	16.1036	15.8352	14.8197	1.65137			0	15.8723	16.1994	18.8658	20.49	17.8569	2.20885			0	20.4823	15.9169	21.9917	22.7124	20.2758	3.05089
	DARPin	1.8 H	% cell viability relative to naïve (CellTiterGlo)							DARPin	7.5 A	% cell viability relative to naïve (CellTiterGlo)							DARPin	3.11H	% cell viability relative to naïve (CellTiterGlo)
			Experiment1		Experiment 2							Experiment1		Experiment 2							Experiment1		Experiment 2
		Concentration (nM)	Rep 1	Rep 2	Rep 1	Rep 2	Average	stdev			Concentration (nM)	Rep 1	Rep 2	Rep 1	Rep 2	Average	stdev			Concentration (nM)	Rep 1	Rep 2	Rep 1	Rep 2	Average	stdev
		Naïve	98.8199	101.18	104.517	95.483	100	3.81189			Naïve	99.743	100.257	99.8318	100.168	100	0.250777			Naïve	103.319	96.6809	100.907	99.0928	100	2.80947
		200	96.9893	101.104	97.4169	96.9553	98.1164	2.00285			200	97.756	95.6395	91.758	94.132	94.8214	2.52593			200	95.0257	87.8397	106.125	102.734	97.931	8.17469
		100	96.7338	96.3529	97.7538	97.4585	97.0747	0.644416			100	94.1804	91.5932	92.7677	85.941	91.1206	3.61143			100	79.0247	80.4742	95.2416	96.4903	87.8077	9.33759
		20	83.6223	82.0934	89.0795	89.4996	86.0737	3.76937			20	81.1328	78.3943	86.4461	82.7073	82.1701	3.36181			20	60.7827	50.1493	75.0851	69.797	63.9535	10.9342
		10	51.6013	45.4766	70.2359	70.5727	59.4716	12.8699			10	53.1829	56.8125	65.4034	65.8021	60.3002	6.30169			10	25.5171	27.9475	46.1123	45.7814	36.3396	11.1386
		5	26.058	27.3951	46.6421	48.0312	37.0316	11.9253			5	37.562	27.3463	48.3118	47.4448	40.1662	9.83974			5	25.5383	29.192	34.3452	38.0077	31.7708	5.50819
		1	16.9793	16.6012	19.283	20.1267	18.2476	1.72454			1	18.7972	24.2702	18.0503	23.7094	21.2068	3.23611			1	20.5085	18.3261	19.729	21.1199	19.9209	1.20595
		0	12.4746	14.8653	16.1036	15.8352	14.8197	1.65137			0	15.8723	16.1994	18.8658	20.49	17.8569	2.20885			0	20.4823	15.9169	21.9917	22.7124	20.2758	3.05089
	DARPin	1.11 E	% cell viability relative to naïve (CellTiterGlo)							DARPin	5.9 C	% cell viability relative to naïve (CellTiterGlo)							DARPin	8.1B	% cell viability relative to naïve (CellTiterGlo)
			Experiment1		Experiment 2							Experiment1		Experiment 2							Experiment1		Experiment 2
		Concentration (nM)	Rep 1	Rep 2	Rep 1	Rep 2	Average	stdev			Concentration (nM)	Rep 1	Rep 2	Rep 1	Rep 2	Average	stdev			Concentration (nM)	Rep 1	Rep 2	Rep 1	Rep 2	Average	stdev
		Naïve	98.8199	101.18	104.517	95.483	100	3.81189			Naïve	99.743	100.257	99.8318	100.168	100	0.250777			Naïve	103.319	96.6809	100.907	99.0928	100	2.80947
		200	98.7983	94.9366	96.8837	94.5257	96.2861	1.96541			200	93.1741	94.7806	90.5467	92.398	92.7249	1.75869			200	92.8695	107.863	103.354	103.841	101.982	6.40222
		100	90.9043	92.8749	93.75	90.461	91.9976	1.57025			100	92.8042	95.7218	86.5702	87.803	90.7248	4.28533			100	87.7026	85.246	103.887	104.909	95.436	10.405
		20	84.0763	86.476	85.9229	89.8892	86.5911	2.42637			20	80.2272	73.3996	82.5318	78.9975	78.789	3.8801			20	65.3065	68.7122	87.4808	87.774	77.3183	11.9854
		10	58.5939	62.0901	69.5434	68.3096	64.6342	5.18223			10	49.1222	43.5991	62.4071	64.1157	54.811	10.039			10	32.5871	35.9773	55.7588	62.317	46.6601	14.607
		5	42.0534	41.9314	43.1375	57.4436	46.1415	7.55424			5	32.5674	40.1353	45.2351	39.499	39.3592	5.20504			5	33.2833	29.6931	44.235	38.7413	36.4882	6.36485
		1	15.225	19.3243	20.4336	21.5614	19.1361	2.7627			1	19.0274	19.5876	21.7635	20.1904	20.1422	1.18059			1	20.1028	31.7122	22.7545	17.5579	23.0319	6.16357
		0	12.4746	14.8653	16.1036	15.8352	14.8197	1.65137			0	15.8723	16.1994	18.8658	20.49	17.8569	2.20885			0	20.4823	15.9169	21.9917	22.7124	20.2758	3.05089

## Sheet: Fig 1B
DARPin	1.2E
		Experiment 1 (plotted)	Experiment 2
	Concentration (nM)	A450	A450
	125	1.0494	0.6465
	25	0.9724	0.5225
	5	0.8163	0.4788
	1	0.6274	0.4451
	0.2	0.3797	0.3465
	0.04	0.2602	0.2717
	0	0.1998	0.2149
DARPin	1.4E						DARPin	3.11H
		Experiment 1 (plotted)	Experiment 2						Experiment 1 (plotted)	Experiment 2
	Concentration (nM)	A450	A450					Concentration (nM)	A450	A450
	125	2.0672	3.2349					125	2.1724	2.0291
	25	2.1032	3.176					25	1.8273	1.7598
	5	1.9335	3.1662					5	1.1671	1.3507
	1	1.7155	2.7315					1	0.4008	0.6229
	0.2	1.0036	1.5992					0.2	0.0985	0.1341
	0.04	0.3731	0.2361					0.04	0.064	0.0684
	0	0.2757	0.0474					0	0.0598	0.0649
DARPin	1.8H						DARPin	8.1B
		Experiment 1 (plotted)	Experiment 2						Experiment 1 (plotted)	Experiment 2
	Concentration (nM)	A450	A450					Concentration (nM)	A450	A450
	125	2.1876	1.3047					125	1.0968	1.2544
	25	2.1483	1.29					25	0.7518	0.8007
	5	2.1117	1.2135					5	0.2793	0.372
	1	1.5786	1.0541					1	0.0944	0.12
	0.2	0.8947	0.689					0.2	0.0611	0.065
	0.04	0.3566	0.5125					0.04	0.0591	0.062
	0	0.2235	0.4556					0	0.0597	0.06
DARPin	1.11E						DARPin	3.9G
		Experiment 1 (plotted)	Experiment 2						Experiment 1 (plotted)	Experiment 2
	Concentration (nM)	A450	A450					Concentration (nM)	A450	A450
	125	2.2199	1.3693					125	0.1052	0.1894
	25	2.1212	1.2634					25	0.0718	0.098
	5	2.0781	1.2371					5	0.0609	0.069
	1	1.4071	0.952					1	0.0587	0.0641
	0.2	0.426	0.411					0.2	0.0573	0.0599
	0.04	0.2188	0.3168					0.04	0.0597	0.0605
	0	0.1877	0.2683					0	0.059	0.0619
DARPin	5.8B
		Experiment 1 (plotted)	Experiment 2
	Concentration (nM)	A450	A450
	125	1.6491	1.09
	25	1.5652	0.9731
	5	1.4993	0.9607
	1	1.2193	0.8086
	0.2	0.7128	0.6529
	0.04	0.2844	0.5861
	0	0.2097	0.2711
DARPin	5.5A
		Experiment 1 (plotted)	Experiment 2
	Concentration (nM)	A450	A450
	125	1.3202	0.845
	25	1.2307	0.7376
	5	0.9866	0.6357
	1	0.7323	0.5739
	0.2	0.4346	0.4567
	0.04	0.2385	0.364
	0	0.1832	0.2378
DARPin	7.5A
		Experiment 1 (plotted)	Experiment 2
	Concentration (nM)	A450	A450
	125	1.5125	0.7276
	25	1.6392	0.7718
	5	1.1618	0.7435
	1	0.9407	0.6033
	0.2	0.6129	0.4726
	0.04	0.3084	0.6499
	0	0.212	0.3258
DARPin	5.9C
		Experiment 1 (plotted)	Experiment 2
	Concentration (nM)	A450	A450
	125	1.9739	2.7818
	25	2.0271	2.6641
	5	1.7815	2.5121
	1	1.537	1.5456
	0.2	0.8119	0.4525
	0.04	0.2954	0.0899
	0	0.1983	0.0582
DARPin	3.5B
		Experiment 1 (plotted)	Experiment 2
	Concentration (nM)	A450	A450
	125	1.8235	2.4927
	25	1.8121	2.4646
	5	1.7579	2.1472
	1	1.2462	1.2083
	0.2	0.7205	0.2476
	0.04	0.2828	0.0937
	0	0.2086	0.0826

## Sheet: Fig 1C
		Experiment 1	Experiment 2
	DARPin	EC50 (nM)	EC50 (nM)	Average EC50 (nM)	stdev
	1.2E	2.03	2.7	2.365	0.473762
	1.4E	2.5	3.5	3	0.707107
	1.8H	6.8	11.4	9.1	3.25269
	1.11E	6.6	8.3	7.45	1.20208
	5.8B	8.7	12	10.35	2.33345
	5.5A	9.2	13.4	11.3	2.96985
	7.5A	8	12.4	10.2	3.11127
	5.9C	9.5	10.8	10.15	0.919239
	3.11H	14.7	32.2	23.45	12.3744
	3.5B	8.4	18.2	13.3	6.92965
	8.1B	9.7	19.1	14.4	6.6468
	3.9G	27.7	57.7	42.7	21.2132

## Sheet: Fig 2A
		DLD-1	% cell viability relative to naïve (CellTiterGlo)								DLD-6	% cell viability relative to naïve (CellTiterGlo)
			Experiment1		Experiment 2							Experiment1		Experiment 2
		Concentration (nM)	Rep 1	Rep 2	Rep 1	Rep 2	Average	stdev			Concentration (nM)	Rep 1	Rep 2	Rep 1	Rep 2	Average	stdev
		Naïve	99.0735	100.926	100.104	99.8961	100	0.761214			Naïve	98.4624	101.538	101.83	98.1698	100	1.95171
		5	96.5598	93.5224	98.2579	99.3529	96.9232	2.54182			5	95.8731	93.391	91.1939	102.54	95.7495	4.91406
		1	98.985	101.435	92.9885	101.085	98.6233	3.90926			1	87.7398	97.7195	93.6013	107.878	96.7347	8.48281
		0.2	100.247	94.6956	95.5404	97.7181	97.0502	2.48245			0.2	87.0276	100.756	100.957	99.8821	97.1557	6.76821
		0.04	92.0014	92.2071	90.2642	91.2063	91.4197	0.883025			0.04	85.9142	99.8581	93.8703	89.8828	92.3813	5.94939
		0.008	51.4693	54.9832	27.7789	28.0387	40.5675	14.6876			0.008	69.2734	80.7717	34.8706	28.6955	53.4028	25.5267
		0.0016	31.9876	29.0785	16.6986	17.329	23.7734	7.89937			0.0016	36.0879	35.8499	11.4117	10.0645	23.3535	14.5777
		0.00032	24.1515	24.96	15.8116	14.7285	19.9129	5.38944			0.00032	18.9134	24.369	9.70867	9.69577	15.6717	7.24389
		0	23.9479	26.4076	15.7799	13.5817	19.9293	6.20826			0	22.9695	22.8524	11.1067	11.9255	17.2135	6.58748
		DLD-2	% cell viability relative to naïve (CellTiterGlo)								DLD-7	% cell viability relative to naïve (CellTiterGlo)
			Experiment1		Experiment 2							Experiment1		Experiment 2
		Concentration (nM)	Rep 1	Rep 2	Rep 1	Rep 2	Average	stdev			Concentration (nM)	Rep 1	Rep 2	Rep 1	Rep 2	Average	stdev
		Naïve	99.0735	100.926	100.104	99.8961	100	0.761214			Naïve	98.4624	101.538	101.83	98.1698	100	1.95171
		5	95.8051	99.5171	95.1152	95.2688	96.4266	2.08151			5	94.8075	92.2392	102.035	105.298	98.5951	6.09674
		1	63.5449	67.5569	89.8455	86.8422	76.9474	13.3176			1	96.3336	100.284	105.158	105.752	101.882	4.43659
		0.2	28.5048	20.7089	31.5266	36.3717	29.278	6.56771			0.2	104.866	102.931	101.009	102.186	102.748	1.61851
		0.04	17.9106	17.6558	19.1998	17.7676	18.1334	0.718518			0.04	98.7601	101.816	92.2834	93.1058	96.4913	4.5705
		0.008	15.3589	15.768	16.2314	17.4036	16.1905	0.883826			0.008	80.5394	88.6114	28.8335	31.3445	57.3322	31.6465
		0.0016	17.5805	17.5553	15.4297	16.4632	16.7572	1.02687			0.0016	39.7562	44.5263	11.7785	10.6309	26.673	17.9732
		0.00032	16.1235	15.421	14.3182	16.7861	15.6622	1.05525			0.00032	26.2636	27.4576	9.15301	10.3549	18.3073	9.90073
		0	15.7799	13.5817	16.3505	16.4977	15.5524	1.34981			0	22.9695	22.8524	11.1067	11.9255	17.2135	6.58748
		DLD-3	% cell viability relative to naïve (CellTiterGlo)								DLD-10	% cell viability relative to naïve (CellTiterGlo)
			Experiment1		Experiment 2							Experiment1		Experiment 2
		Concentration (nM)	Rep 1	Rep 2	Rep 1	Rep 2	Average	stdev			Concentration (nM)	Rep 1	Rep 2	Rep 1	Rep 2	Average	stdev
		Naïve	99.0735	100.926	100.104	99.8961	100	0.761214			Naïve	98.4624	101.538	101.83	98.1698	100	1.95171
		5	100.362	98.2344	101.055	103.563	100.803	2.19632			5	96.4373	97.497	103.993	107.13	101.264	5.14284
		1	100.264	99.0043	102.287	101.899	100.864	1.51823			1	101.973	104.68	105.436	107.359	104.862	2.23174
		0.2	98.3822	101.091	96.667	100.263	99.1009	1.97934			0.2	104.667	104.643	103.561	105.405	104.569	0.759655
		0.04	85.2887	91.1549	84.7886	87.0434	87.0689	2.89049			0.04	101.849	100.724	85.409	91.8711	94.9631	7.77683
		0.008	49.6317	49.7527	28.5819	29.3247	39.3228	11.9776			0.008	72.2623	77.0363	19.7223	19.016	47.0092	31.9768
		0.0016	28.1532	27.8902	17.6155	18.2091	22.967	5.84266			0.0016	34.533	37.1494	10.847	11.2211	23.4376	14.363
		0.00032	24.9446	22.12	17.2418	15.5066	19.9532	4.34867			0.00032	26.2348	25.5707	10.7416	9.98103	18.132	8.98231
		0	23.9479	26.4076	15.7799	13.5817	19.9293	6.20826			0	22.9695	22.8524	11.1067	11.9255	17.2135	6.58748
		DLD-4	% cell viability relative to naïve (CellTiterGlo)								DLD-11	% cell viability relative to naïve (CellTiterGlo)
			Experiment1		Experiment 2							Experiment1		Experiment 2
		Concentration (nM)	Rep 1	Rep 2	Rep 1	Rep 2	Average	stdev			Concentration (nM)	Rep 1	Rep 2	Rep 1	Rep 2	Average	stdev
		Naïve	99.0735	100.926	101.83	98.1698	100	1.6749			Naïve	98.4624	101.538	99.7655	100.235	100	1.26996
		5	97.5142	98.3016	90.5492	100.062	96.6067	4.17639			5	96.1111	95.0054	84.2584	80.7012	89.019	7.70244
		1	100.969	99.5131	95.1649	100.576	99.0556	2.66564			1	100.753	103.392	73.6862	80.8517	89.6706	14.6556
		0.2	102.361	101.892	97.0877	100.516	100.464	2.38322			0.2	95.9248	92.4541	61.2035	62.5356	78.0295	18.7215
		0.04	102.704	104.755	89.4544	98.6783	98.898	6.78291			0.04	45.8183	44.5955	22.5856	20.833	33.4581	13.5944
		0.008	90.2658	97.0612	71.7167	78.6055	84.4123	11.3894			0.008	26.7685	30.4309	16.1104	18.4887	22.9496	6.76331
		0.0016	56.8593	55.4441	17.1601	16.1561	36.4049	22.8126			0.0016	25.5303	24.7375	15.1426	13.4608	19.7178	6.29988
		0.00032	31.9109	23.8308	9.45068	10.7708	18.9908	10.7848			0.00032	21.4359	26.7798	13.657	14.3371	19.0524	6.23803
		0	23.9479	26.4076	11.1067	11.9255	18.3469	7.95825			0	22.9695	22.8524	13.8739	12.7985	18.1236	5.5456
		DLD-5	% cell viability relative to naïve (CellTiterGlo)								DLD-12	% cell viability relative to naïve (CellTiterGlo)
			Experiment1		Experiment 2							Experiment1		Experiment 2
		Concentration (nM)	Rep 1	Rep 2	Rep 1	Rep 2	Average	stdev			Concentration (nM)	Rep 1	Rep 2	Rep 1	Rep 2	Average	stdev
		Naïve	99.0735	100.926	100.104	99.8961	100	0.761214			Naïve	98.4624	101.538	101.83	98.1698	100	1.95171
		5	98.2383	99.1752	99.8758	90.0428	96.833	4.57625			5	98.8463	95.4469	107.437	99.4262	100.289	5.07833
		1	96.6885	95.7344	73.891	71.6712	84.4963	13.5634			1	104.912	103.764	106.956	106.366	105.5	1.44076
		0.2	96.5598	93.0153	82.5889	79.8443	88.0021	8.0461			0.2	110.35	108.63	105.102	104.438	107.13	2.82745
		0.04	77.1186	81.3122	61.1894	57.3769	69.2493	11.7382			0.04	105.108	106.936	99.2738	105.264	104.145	3.35134
		0.008	44.2919	33.7023	25.9967	18.9249	30.729	10.8708			0.008	94.0052	98.4336	64.3432	74.7436	82.8814	16.0779
		0.0016	25.7432	19.0938	17.6843	13.7309	19.0631	4.99862			0.0016	51.3102	45.9642	15.221	13.97	31.6163	19.7814
		0.00032	24.3608	16.3711	14.918	13.8433	17.3733	4.77211			0.00032	33.5331	25.1309	9.87028	10.9105	19.8612	11.4691
		0	23.9479	26.4076	15.7799	13.5817	19.9293	6.20826			0	22.9695	22.8524	11.1067	11.9255	17.2135	6.58748

## Sheet: Fig 2B
	DLD-1	Experiment 1 (plotted)						DLD-1	Experiment 2
		Rep 1	Rep 2						Rep 1	Rep 2
	Concentration (nM)	A450	A450	Average	stdev			Concentration (nM)	A450	A450	Average	stdev
	125	2.7661	2.1688	2.46745	0.422355			125	4.98264	5.59624	5.28944	0.433881
	25	1.9944	1.9287	1.96155	0.0464569			25	2.79656	3.94394	3.37025	0.81132
	5	1.5568	1.5545	1.55565	0.00162635			5	0.77272	1.39256	1.08264	0.438293
	1	1.201	1.1416	1.1713	0.0420021			1	0.2927	0.5612	0.42695	0.189858
	0.2	0.6526	0.5839	0.61825	0.0485782			0.2	0.2413	0.1859	0.2136	0.0391737
	0.04	0.4672	0.2689	0.36805	0.140219			0.04	0.2006	0.1764	0.1885	0.017112
	0.008	0.3318	0.154	0.2429	0.125724			0.008	0.298	0.1945	0.24625	0.0731856
	0	0.1948	0.1947	0.19475	7.07107e-05			0	0.2095	0.1927	0.2011	0.0118794
	DLD-2	Experiment 1 (plotted)						DLD-2	Experiment 2
		Rep 1	Rep 2						Rep 1	Rep 2
	Concentration (nM)	A450	A450	Average	stdev			Concentration (nM)	A450	A450	Average	stdev
	125	2.37	2.1997	2.28485	0.12042			125	1.7854	1.6618	1.7236	0.0873984
	25	2.0651	1.7167	1.8909	0.246356			25	1.0279	0.9106	0.96925	0.0829436
	5	1.1179	1.067	1.09245	0.0359917			5	0.3753	0.3614	0.36835	0.00982878
	1	0.3979	0.3317	0.3648	0.0468105			1	0.2481	0.2309	0.2395	0.0121622
	0.2	0.2246	0.179	0.2018	0.0322441			0.2	0.1977	0.1872	0.19245	0.00742462
	0.04	0.1654	0.1512	0.1583	0.0100409			0.04	0.1985	0.1938	0.19615	0.0033234
	0.008	0.1554	0.1394	0.1474	0.0113137			0	0.1844	0.1548	0.1696	0.0209304
	0	0.2184	0.1724	0.1954	0.0325269
	DLD-3	Experiment 1 (plotted)						DLD-3	Experiment 2
		Rep 1	Rep 2						Rep 1	Rep 2
	Concentration (nM)	A450	A450	Average	stdev			Concentration (nM)	A450	A450	Average	stdev
	125	2.3871	2.399	2.39305	0.00841457			125	3.70854	3.76761	3.73807	0.0417688
	25	2.0778	1.9598	2.0188	0.0834386			25	3.22212	3.03765	3.12988	0.13044
	5	1.6008	1.3972	1.499	0.143967			5	2.2829	2.4587	2.3708	0.124309
	1	0.7197	0.5265	0.6231	0.136613			1	1.0167	0.9156	0.96615	0.0714885
	0.2	0.2425	0.2403	0.2414	0.00155563			0.2	0.3056	0.3205	0.31305	0.0105359
	0.04	0.1814	0.1867	0.18405	0.00374767			0.04	0.2399	0.201	0.22045	0.0275065
	0.008	0.1642	0.1656	0.1649	0.000989949			0	0.1844	0.1548	0.1696	0.0209304
	0	0.2169	0.1995	0.2082	0.0123037
	DLD-4	Experiment 1 (plotted)						DLD-4	Experiment 2
		Rep 1	Rep 2						Rep 1	Rep 2
	Concentration (nM)	A450	A450	Average	stdev			Concentration (nM)	A450	A450	Average	stdev
	125	2.2192	2.1938	2.2065	0.0179605			125	5.37735	5.4252	5.40128	0.0338351
	25	2.3169	1.8962	2.10655	0.29748			25	4.99884	4.80216	4.9005	0.139074
	5	1.5741	1.5322	1.55315	0.0296278			5	4.389	4.44246	4.41573	0.0378019
	1	0.9706	0.9841	0.97735	0.00954594			1	3.36864	3.23763	3.30313	0.0926381
	0.2	0.4089	0.4614	0.43515	0.0371231			0.2	1.0514	0.9316	0.9915	0.0847114
	0.04	0.2254	0.2536	0.2395	0.0199404			0.04	0.3132	0.3094	0.3113	0.00268701
	0.008	0.1433	0.229	0.18615	0.0605991			0	0.1844	0.1548	0.1696	0.0209304
	0	0.1521	0.2154	0.18375	0.0447599
	DLD-5	Experiment 1 (plotted)						DLD-5	Experiment 2
		Rep 1	Rep 2						Rep 1	Rep 2
	Concentration (nM)	A450	A450	Average	stdev			Concentration (nM)	A450	A450	Average	stdev
	125	1.473	1.4676	1.4703	0.00381838			125	3.46599	3.70062	3.5833	0.165908
	25	1.1804	1.1664	1.1734	0.00989949			25	2.9937	2.96538	2.97954	0.0200253
	5	0.644	0.6752	0.6596	0.0220617			5	2.5067	2.8125	2.6596	0.216233
	1	0.329	0.3721	0.35055	0.0304763			1	1.5775	1.8898	1.73365	0.220829
	0.2	0.175	0.1898	0.1824	0.0104652			0.2	0.583	0.6637	0.62335	0.0570635
	0.04	0.156	0.1705	0.16325	0.010253			0.04	0.2687	0.248	0.25835	0.0146371
	0.008	0.1669	0.2066	0.18675	0.0280721			0	0.1844	0.1548	0.1696	0.0209304
	0	0.1789	0.2051	0.192	0.0185262
	DLD-6	Experiment 1 (plotted)						DLD-6	Experiment 2
		Rep 1	Rep 2						Rep 1	Rep 2
	Concentration (nM)	A450	A450	Average	stdev			Concentration (nM)	A450	A450	Average	stdev
	125	3.17768	2.51328	2.84548	0.469802			125	3.78939	3.89004	3.83971	0.0711703
	25	2.7283	2.8003	2.7643	0.0509117			25	3.67191	3.67191	3.67191	0
	5	2.3035	2.0165	2.16	0.20294			5	2.807	2.7776	2.7923	0.0207889
	1	1.1951	1.19	1.19255	0.00360624			1	1.0375	1.0725	1.055	0.0247487
	0.2	0.4032	0.38	0.3916	0.0164049			0.2	0.3224	0.3438	0.3331	0.0151321
	0.04	0.1877	0.6185	0.4031	0.304622			0.04	0.1977	0.2163	0.207	0.0131522
	0.008	0.1642	0.5496	0.3569	0.272519			0	0.1844	0.1548	0.1696	0.0209304
	0	0.1937	0.7129	0.4533	0.36713
	DLD-7	Experiment 1 (plotted)						DLD-7	Experiment 2
		Rep 1	Rep 2						Rep 1	Rep 2
	Concentration (nM)	A450	A450	Average	stdev			Concentration (nM)	A450	A450	Average	stdev
	125	2.6382	2.6659	2.65205	0.0195869			125	3.93888	4.20189	4.07038	0.185976
	25	2.8792	2.7607	2.81995	0.0837922			25	3.87981	3.79698	3.83839	0.0585697
	5	1.6377	1.6836	1.66065	0.0324562			5	3.23796	3.46731	3.35263	0.162175
	1	0.4295	0.5162	0.47285	0.0613062			1	1.9161	2.0016	1.95885	0.0604576
	0.2	0.2178	0.1936	0.2057	0.017112			0.2	0.4673	0.5035	0.4854	0.0255973
	0.04	0.1573	0.1572	0.15725	7.07107e-05			0.04	0.2326	0.2672	0.2499	0.0244659
	0.008	0.1433	0.1337	0.1385	0.00678823			0	0.1844	0.1548	0.1696	0.0209304
	0	0.1864	0.1775	0.18195	0.00629325
	DLD-10	Experiment 1 (plotted)						DLD-10	Experiment 2
		Rep 1	Rep 2						Rep 1	Rep 2
	Concentration (nM)	A450	A450	Average	stdev			Concentration (nM)	A450	A450	Average	stdev
	125	2.1873	2.248	2.21765	0.0429214			125	5.33758	4.99534	5.16646	0.242
	25	1.3728	1.2726	1.3227	0.0708521			25	4.3431	4.35085	4.34698	0.00548008
	5	0.4954	0.524	0.5097	0.0202233			5	3.6518	3.782	3.7169	0.0920653
	1	0.2298	0.2222	0.226	0.00537401			1	2.4531	2.3717	2.4124	0.0575585
	0.2	0.1601	0.1816	0.17085	0.0152028			0.2	0.732	0.7104	0.7212	0.0152735
	0.04	0.1466	0.1616	0.1541	0.0106066			0.04	0.223	0.2357	0.22935	0.00898026
	0.008	0.167	0.1698	0.1684	0.0019799			0	0.1844	0.1548	0.1696	0.0209304
	0	0.1619	0.208	0.18495	0.0325976
	DLD-11	Experiment 1 (plotted)						DLD-11	Experiment 2
		Rep 1	Rep 2						Rep 1	Rep 2
	Concentration (nM)	A450	A450	Average	stdev			Concentration (nM)	A450	A450	Average	stdev
	125	2.2303	2.5188	2.37455	0.204			125	3.69055	3.56221	3.62638	0.0907501
	25	2.0749	1.9034	1.98915	0.121269			25	2.8212	2.6976	2.7594	0.0873984
	5	1.5086	1.432	1.4703	0.0541644			5	2.048	2.0332	2.0406	0.0104652
	1	0.6333	0.6563	0.6448	0.0162635			1	0.7407	0.7672	0.75395	0.0187383
	0.2	0.2324	0.2486	0.2405	0.0114551			0.2	0.2572	0.2633	0.26025	0.00431335
	0.04	0.155	0.1699	0.16245	0.0105359			0.04	0.1516	0.1802	0.1659	0.0202233
	0.008	0.1389	0.2486	0.19375	0.0775696			0	0.1844	0.1548	0.1696	0.0209304
	0	0.1827	0.2837	0.2332	0.0714178
	DLD-12	Experiment 1 (plotted)						DLD-12	Experiment 2
		Rep 1	Rep 2						Rep 1	Rep 2
	Concentration (nM)	A450	A450	Average	stdev			Concentration (nM)	A450	A450	Average	stdev
	125	3.79842	3.62036	3.70939	0.125907			125	4.20966	4.53024	4.36995	0.226684
	25	3.48812	3.23234	3.36023	0.180864			25	2.95152	3.56564	3.25858	0.434248
	5	3.18362	2.83794	3.01078	0.244433			5	2.30984	2.74768	2.52876	0.3096
	1	1.9989	1.7812	1.89005	0.153937			1	0.8325	0.9324	0.88245	0.07064
	0.2	0.7609	0.6566	0.70875	0.0737512			0.2	0.5926	0.6325	0.61255	0.0282136
	0.04	0.288	0.2893	0.28865	0.000919239			0.04	0.304	0.3787	0.34135	0.0528209
	0.008	0.1893	0.2583	0.2238	0.0487904			0.008	0.2161	0.2506	0.23335	0.0243952
	0	0.2765	0.2678	0.27215	0.00615183			0	0.2077	0.2503	0.229	0.0301227

## Sheet: Fig 2C
				Experiment 1	Experiment 2	Experiment 3	Experiment 4
			DARPin	EC50 (nM)	EC50 (nM)	EC50 (nM)	EC50 (nM)	Average EC50 (nM)	stdev
			DLD1	0.01	0.85			0.43	0.59397
			DLD2	0.25	1.83			1.04	1.11723
			DLD3	0.013	0.09			0.0515	0.0544472
			DLD4	0.003	0.00562	0.0027	0.0027	0.003505	0.00141707
			DLD5	0.022	0.04			0.031	0.0127279
			DLD6	0.005	0.02			0.0125	0.0106066
			DLD7	0.003	0.0142	0.034	0.0048	0.014	0.0142089
			DLD10	0.005	0.004	0.006		0.005	0.001
			DLD11	0.26	0.42	0.32	0.16	0.29	0.108934
			DLD12	0.004	0.015	0.00645	0.0053	0.0076875	0.00497667

## Sheet: Fig 3
		U3	% cell viability relative to naïve (CellTiterGlo)								DLD-4	% cell viability relative to naïve (CellTiterGlo)								U3 + 1.4E (DLD-4)	% cell viability relative to naïve (CellTiterGlo)
			Experiment1		Experiment 2							Experiment1		Experiment 2							Experiment1		Experiment 2
		Concentration (nM)	Rep 1	Rep 2	Rep 1	Rep 2	Average	stdev			Concentration (nM)	Rep 1	Rep 2	Rep 1	Rep 2	Average	stdev			Conc	Rep 1	Rep 2	Rep 1	Rep 2	Average	stdev
		Naïve	101.96	98.0402	99.9532	100.047	100	1.60067			Naïve	101.83	98.1698	101.289	98.7106	100	1.82794			Naïve	99.6326	100.367	100.13	99.8699	100	0.318242
		25	19.6822	32.2788	27.9983	27.63	26.8973	5.25256			25	85.6631	84.0655	98.5035	98.9635	91.7989	8.03612			25	91.4677	96.8118	95.941	87.8418	93.0156	4.16867
		5	18.4808	18.404	19.84	16.5244	18.3123	1.36223			5	90.5492	100.062	106.438	105.617	100.666	7.31534			5	87.0083	95.0654	109.777	110.541	100.598	11.5239
		1	17.6115	13.9088	14.3103	11.443	14.3184	2.53509			1	95.1649	100.576	108.364	110.838	103.736	7.19515			1	49.3131	50.6697	41.0629	38.7101	44.9389	5.93847
		0.2	13.2869	12.4433	11.3441	11.4481	12.1306	0.916369			0.2	97.0877	100.516	110.452	111.447	104.876	7.16338			0.2	15.1718	13.5925	18.2541	14.9244	15.4857	1.97162
		0.04	11.5229	10.773	11.651	10.4475	11.0986	0.581706			0.04	89.4544	98.6783	107.781	110.571	101.621	9.56965			0.04	11.6092	10.0542	13.1974	11.9849	11.7114	1.29615
		0.008	15.0445	10.5471	10.41	10.2532	11.5637	2.32365			0.008	71.7167	78.6055	89.9583	96.4237	84.176	11.1011			0.008	10.8935	10.0682	13.3791	12.4972	11.7095	1.50197
		0.0016	11.3716	9.77811	11.3784	9.70782	10.559	0.942685			0.0016	17.1601	16.1561	25.6746	26.5294	21.3801	5.47894			0.0016	10.0647	9.57355	12.4434	12.022	11.0259	1.41833
		0.00032	15.07	11.1117	13.0044	10.976	12.5405	1.92375			0.00032	9.45068	10.7708	12.3487	11.6213	11.0479	1.24481			0.00032	9.99673	9.03039	14.1062	11.9002	11.2584	2.24185
		0	11.5186	12.3645	9.38906	9.53736	10.7024	1.47321			0	11.1067	11.9255	11.0001	13.3983	11.8577	1.10717			0	10.2962	10.5105	16.1101	14.1209	12.7594	2.84053
		1.4e (group 2)	% cell viability relative to naïve (CellTiterGlo)								DLD-6	% cell viability relative to naïve (CellTiterGlo)								U3+ 3.5B (DLD-6)	% cell viability relative to naïve (CellTiterGlo)
			Experiment1		Experiment 2							Experiment1		Experiment 2							Experiment1		Experiment 2
		Concentration (nM)	Rep 1	Rep 2	Rep 1	Rep 2	Average	stdev			Concentration (nM)	Rep 1	Rep 2	Rep 1	Rep 2	Average	stdev			Concentration (nM)	Rep 1	Rep 2	Rep 1	Rep 2	Average	stdev
		Naïve	101.96	98.0402	99.9532	100.047	100	1.60067			Naïve	101.83	98.1698	101.289	98.7106	100	1.82794			Naïve	99.6326	100.367	100.13	99.8699	100	0.318242
		25	109.702	97.5458	103.736	102.374	103.339	5.00442			25	96.4812	93.4417	94.9955	104.265	97.2957	4.80878			25	102.624	100.773	98.5892	89.8949	97.9704	5.6306
		5	80.5777	56.8436	75.3522	78.5263	72.8249	10.8689			5	91.1939	102.54	109.307	107.314	102.589	8.1099			5	77.1005	71.6521	87.6454	81.4175	79.4539	6.76667
		1	26.1797	26.5823	22.9508	24.6419	25.0887	1.65243			1	93.6013	107.878	109.458	112.739	105.919	8.45771			1	22.4539	19.3962	20.7556	23.1269	21.4331	1.68516
		0.2	10.4706	13.6193	13.4733	12.5782	12.5353	1.45139			0.2	100.957	99.8821	107.994	108.073	104.227	4.41797			0.2	11.1617	13.0736	13.6313	14.0381	12.9762	1.27262
		0.04	10.4663	10.2767	9.48777	10.1986	10.1074	0.428082			0.04	93.8703	89.8828	75.2095	72.8325	82.9488	10.4817			0.04	11.3461	11.0849	11.7412	11.8113	11.4959	0.342055
		0.008	9.93375	10.0894	10.4578	8.73624	9.80428	0.74516			0.008	34.8706	28.6955	17.4993	17.8108	24.719	8.53844			0.008	10.1431	9.60319	10.4542	10.4728	10.1683	0.40597
		0.0016	9.40973	8.73237	10.538	9.03283	9.42822	0.790022			0.0016	11.4117	10.0645	13.0761	12.9753	11.8819	1.43127			0.0016	11.2383	9.02852	10.4335	10.3695	10.2674	0.915679
		0.00032	10.2447	10.2193	10.0588	11.3425	10.4663	0.589885			0.00032	9.70867	9.69577	10.7363	11.7188	10.4649	0.967688			0.00032	8.86303	9.00075	11.1814	11.4209	10.1165	1.37251
		0	11.5186	12.3645	9.38906	9.53736	10.7024	1.47321			0	11.1067	11.9255	11.0001	13.3983	11.8577	1.10717			0	10.2962	10.5105	16.1101	14.1209	12.7594	2.84053
		1.11E (Group 4)	% cell viability relative to naïve (CellTiterGlo)								DLD-7	% cell viability relative to naïve (CellTiterGlo)								U3+ 5.5A(DLD-7)	% cell viability relative to naïve (CellTiterGlo)
			Experiment1		Experiment 2							Experiment1		Experiment 2							Experiment1		Experiment 2
		Concentration (nM)	Rep 1	Rep 2	Rep 1	Rep 2	Average	stdev			Concentration (nM)	Rep 1	Rep 2	Rep 1	Rep 2	Average	stdev			Concentration (nM)	Rep 1	Rep 2	Rep 1	Rep 2	Average	stdev
		Naïve	101.96	98.0402	99.9532	100.047	100	1.60067			Naïve	101.83	98.1698	101.289	98.7106	100	1.82794			Naïve	99.6326	100.367	100.13	99.8699	100	0.318242
		25	104.945	88.5645	90.5454	86.6316	92.6715	8.33662			25	100.113	99.2702	96.6804	99.7849	98.962	1.56008			25	101.767	101.518	91.9894	103.239	99.6285	5.14902
		5	48.0987	39.5134	36.7259	37.4315	40.4424	5.2396			5	102.035	105.298	106.973	112.472	106.694	4.36311			5	79.7804	84.3233	62.1552	71.0148	74.3184	9.81137
		1	19.3478	12.0301	13.1049	13.9453	14.607	3.25624			1	105.158	105.752	110.544	114.236	108.923	4.28514			1	22.9623	23.7736	20.6792	20.9912	22.1016	1.50474
		0.2	14.0453	10.3024	10.3385	10.3657	11.263	1.85509			0.2	101.009	102.186	105.293	112.449	105.234	5.13783			0.2	12.4938	12.5267	11.9622	11.0554	12.0095	0.686707
		0.04	11.2759	12.571	10.3538	10.163	11.0909	1.09987			0.04	92.2834	93.1058	93.7814	94.4203	93.3977	0.91651			0.04	10.5226	10.6027	11.2165	11.9353	11.0693	0.65531
		0.008	11.423	12.3154	9.97196	9.9482	10.9146	1.16091			0.008	28.8335	31.3445	24.9754	21.855	26.7521	4.18571			0.008	9.41693	9.9881	10.7931	10.8715	10.2674	0.69346
		0.0016	10.7242	10.2193	8.82467	9.82207	9.89756	0.804914			0.0016	11.7785	10.6309	12.3736	13.1613	11.9861	1.06629			0.0016	9.59619	7.44736	9.49782	10.0433	9.14617	1.15715
		0.00032	11.1628	10.626	9.66006	9.04128	10.1225	0.951953			0.00032	9.15301	10.3549	8.49565	9.7009	9.42611	0.791301			0.00032	10.3623	9.45521	11.7639	10.6154	10.5492	0.950743
		0	11.5186	12.3645	9.38906	9.53736	10.7024	1.47321			0	11.1067	11.9255	11.0001	13.3983	11.8577	1.10717			0	10.2962	10.5105	16.1101	14.1209	12.7594	2.84053
		5.8B (group 5)	% cell viability relative to naïve (CellTiterGlo)								DLD-10	% cell viability relative to naïve (CellTiterGlo)								U3+ 5.8B (DLD-10)	% cell viability relative to naïve (CellTiterGlo)
			Experiment1		Experiment 2							Experiment1		Experiment 2							Experiment1		Experiment 2
		Concentration (nM)	Rep 1	Rep 2	Rep 1	Rep 2	Average	stdev			Concentration (nM)	Rep 1	Rep 2	Rep 1	Rep 2	Average	stdev			Concentration (nM)	Rep 1	Rep 2	Rep 1	Rep 2	Average	stdev
		Naïve	101.96	98.0402	99.9532	100.047	100	1.60067			Naïve	101.83	98.1698	101.289	98.7106	100	1.82794			Naïve	99.6326	100.367	100.13	99.8699	100	0.318242
		25	94.9937	97.0152	76.0461	72.105	85.04	12.7892			25	99.8621	106.088	96.5583	97.2662	99.9437	4.33552			25	99.6013	100.798	97.6267	95.2925	98.3295	2.41014
		5	39.1322	45.8107	30.855	27.6675	35.8663	8.20348			5	103.993	107.13	112.612	112.474	109.052	4.22957			5	81.4607	83.0104	76.906	81.5	80.7193	2.64256
		1	13.1378	15.626	13.088	13.1358	13.7469	1.25293			1	105.436	107.359	114.213	115.309	110.579	4.91248			1	21.5709	23.0895	20.3364	19.4522	21.1122	1.57876
		0.2	10.9244	12.782	9.59014	9.41968	10.679	1.55503			0.2	103.561	105.405	112.589	112.102	108.414	4.60558			0.2	12.5739	14.0817	12.7037	11.9373	12.8242	0.902814
		0.04	9.5311	10.0999	9.48777	9.08561	9.55111	0.417263			0.04	85.409	91.8711	80.5264	85.7033	85.8775	4.64782			0.04	10.3903	10.648	10.9789	10.3033	10.5801	0.303493
		0.008	11.0949	11.5912	10.4237	9.65161	10.6903	0.841668			0.008	19.7223	19.016	15.3523	14.3983	17.1222	2.63938			0.008	10.5749	10.7402	11.3713	9.33058	10.5042	0.854388
		0.0016	10.0574	9.98287	9.22705	9.19461	9.61548	0.468428			0.0016	10.847	11.2211	10.3647	9.52747	10.4901	0.73124			0.0016	10.6323	9.78246	10.5431	8.39467	9.83814	1.03512
		0.00032	10.8073	12.13	9.18272	9.46058	10.3952	1.35685			0.00032	10.7416	9.98103	9.11512	9.35926	9.79926	0.726349			0.00032	8.35465	8.9641	11.8113	9.88631	9.75409	1.50909
		0	11.5186	12.3645	9.38906	9.53736	10.7024	1.47321			0	11.1067	11.9255	11.0001	13.3983	11.8577	1.10717			0	10.2962	10.5105	16.1101	14.1209	12.7594	2.84053
		5.5A (group 6)	% cell viability relative to naïve (CellTiterGlo)								DLD-12	% cell viability relative to naïve (CellTiterGlo)								U3 + 1.11E (DLD-12)	% cell viability relative to naïve (CellTiterGlo)
			Experiment1		Experiment 2							Experiment1		Experiment 2							Experiment1		Experiment 2
		Concentration (nM)	Rep 1	Rep 2	Rep 1	Rep 2	Average	stdev			Concentration (nM)	Rep 1	Rep 2	Rep 1	Rep 2	Average	stdev			Concentration (nM)	Rep 1	Rep 2	Rep 1	Rep 2	Average	stdev
		Naïve	101.96	98.0402	99.9532	100.047	100	1.60067			Naïve	101.83	98.1698	101.289	98.7106	100	1.82794			Naïve	99.6326	100.367	100.13	99.8699	100	0.318242
		25	95.3964	79.715	82.8234	77.4455	83.8451	8.01017			25	106.429	101.556	95.4963	99.2008	100.671	4.57824			25	100.623	100.033	91.882	87.3788	94.9793	6.44875
		5	45.6871	25.7365	34.0922	29.8613	33.8443	8.60066			5	107.437	99.4262	110.842	112.451	107.539	5.79826			5	87.684	86.0873	84.208	85.8586	85.9595	1.42222
		1	12.6498	16.638	14.0733	11.4396	13.7002	2.23484			1	106.956	106.366	114.318	115.049	110.672	4.64756			1	23.5456	22.9553	24.1556	26.1717	24.207	1.39844
		0.2	10.215	12.9482	10.3044	9.40437	10.718	1.54093			0.2	105.102	104.438	113.633	114.125	109.324	5.26989			0.2	12.1175	11.6771	17.0911	14.5938	13.8699	2.50198
		0.04	10.8967	11.7508	8.99193	8.52647	10.0415	1.53297			0.04	99.2738	105.264	110.043	105.015	104.899	4.40657			0.04	10.5137	10.3849	13.2595	12.3443	11.6256	1.40968
		0.008	11.3547	10.2342	9.18272	8.63387	9.85137	1.20222			0.008	64.3432	74.7436	52.4942	52.6835	61.0661	10.6702			0.008	10.1011	9.88516	11.0224	12.2887	10.8243	1.09372
		0.0016	11.3013	10.279	9.76906	8.49928	9.96217	1.16491			0.0016	15.221	13.97	14.1082	16.1047	14.851	1.00608			0.0016	10.2283	9.74604	13.0734	12.1317	11.2948	1.57054
		0.00032	10.004	10.2042	10.0163	9.17427	9.84969	0.459501			0.00032	9.87028	10.9105	10.1064	10.1239	10.2528	0.453502			0.00032	8.66299	9.31236	13.8833	10.6173	10.619	2.323
		0	11.5186	12.3645	9.38906	9.53736	10.7024	1.47321			0	11.1067	11.9255	11.0001	13.3983	11.8577	1.10717			0	10.2962	10.5105	16.1101	14.1209	12.7594	2.84053
		3.5B (group 10)	% cell viability relative to naïve (CellTiterGlo)
			Experiment1		Experiment 2
		Concentration (nM)	Rep 1	Rep 2	Rep 1	Rep 2	Average	stdev
		Naïve	101.96	98.0402	99.9532	100.047	100	1.60067
		25	89.5294	89.8618	81.298	87.7499	87.1098	3.98392
		5	32.7774	34.52	32.8427	34.6854	33.7064	1.03749
		1	15.0805	11.7976	13.0471	14.6989	13.6561	1.5211
		0.2	12.1449	10.5303	10.0129	10.0743	10.6906	0.996626
		0.04	12.4176	11.8339	8.93389	10.3079	10.8733	1.56937
		0.008	11.0991	9.52253	9.10435	9.58671	9.82819	0.873884
		0.0016	9.72072	11.2993	8.83678	9.05819	9.72875	1.11236
		0.00032	11.0543	9.53338	8.26393	9.48274	9.58359	1.14269
		0	11.5186	12.3645	9.38906	9.53736	10.7024	1.47321

## Sheet: Fig 4
	U3
		Experiment 1 (plotted)	Experiment 2
	Concentration (nM)	A450	A450
	125	0.3998	0.1491
	25	0.3997	0.1121
	5	0.3161	0.0984
	1	0.1686	0.0906
	0.2	0.0913	0.1951
	0.04	0.0784	0.0772
	0	0.0826	0.0768
	1.4e
		Experiment 1 (plotted)	Experiment 2
	Concentration (nM)	A450	A450
	125	2.1781	1.2368
	25	2.1746	1.1335
	5	1.9386	0.9264
	1	1.2718	0.5932
	0.2	0.2784	0.1903
	0.04	0.0934	0.092
	0	0.0826	0.053
	1.11E
		Experiment 1 (plotted)	Experiment 2
	Concentration (nM)	A450	A450
	125	2.4369	1.1988
	25	2.2864	0.9899
	5	1.5594	0.7104
	1	0.3177	0.238
	0.2	0.1086	0.0997
	0.04	0.0918	0.079
	0	0.0826	0.0531
	5.8B
		Experiment 1 (plotted)	Experiment 2
	Concentration (nM)	A450	A450
	125	1.7906	0.7573
	25	1.7148	0.62
	5	1.4191	0.5015
	1	0.5714	0.2706
	0.2	0.1319	0.123
	0.04	0.0886	0.0872
	0	0.0826	0.0528
	5.5A
		Experiment 1 (plotted)	Experiment 2
	Concentration (nM)	A450	A450
	125	1.481	0.5631
	25	1.4382	0.4785
	5	1.1677	0.3499
	1	0.4786	0.1825
	0.2	0.1378	0.0969
	0.04	0.1148	0.08
	0	0.0826	0.0438
	3.5B
		Experiment 1 (plotted)	Experiment 2
	Concentration (nM)	A450	A450
	125	2.4927	1.3649
	25	2.4646	1.1305
	5	2.1472	0.8591
	1	1.2083	0.5064
	0.2	0.2476	0.17
	0.04	0.0937	0.0971
	0	0.0826	0.045
	DLD-4
		Experiment 1 (plotted)	Experiment 2
	Concentration (nM)	A450	A450
	125	4.09864	2.3571
	25	3.65008	1.9448
	5	3.18696	1.4837
	1	1.6169	0.8155
	0.2	0.3142	0.2191
	0.04	0.125	0.0978
	0	0.0826	0.0428
	DLD-6
		Experiment 1 (plotted)	Experiment 2
	Concentration (nM)	A450	A450
	125	2.8471	1.2453
	25	2.6313	0.8715
	5	1.326	0.4419
	1	0.3429	0.1618
	0.2	0.1158	0.0919
	0.04	0.0875	0.0812
	0	0.0826	0.043
	DLD-7
		Experiment 1 (plotted)	Experiment 2
	Concentration (nM)	A450	A450
	125	2.7097	1.2386
	25	2.4263	1.0099
	5	1.4278	0.6958
	1	0.2853	0.2563
	0.2	0.12	0.1063
	0.04	0.0952	0.0827
	0	0.0826	0.0431
	DLD-10
		Experiment 1 (plotted)	Experiment 2
	Concentration (nM)	A450	A450
	125	2.776	1.2228
	25	2.6115	0.9526
	5	2.1957	0.7465
	1	0.8481	0.3802
	0.2	0.1734	0.1312
	0.04	0.0933	0.0917
	0	0.0826	0.0429
	DLD-12
		Experiment 1 (plotted)	Experiment 2
	Concentration (nM)	A450	A450
	125	3.36728	1.5339
	25	3.1668	1.3367
	5	2.6243	1.0924
	1	1.0627	0.5579
	0.2	0.2066	0.171
	0.04	0.1064	0.0983
	0	0.0826	0.0446
	U3 + 1.4e (DLD-4)
		Experiment 1 (plotted)	Experiment 2
	Concentration (nM)	A450	A450
	125	2.7199	1.4052
	25	2.8394	1.2384
	5	2.5423	1.0327
	1	1.7306	0.6688
	0.2	0.3731	0.2165
	0.04	0.1051	0.0979
	0	0.0794	0.082
	U3+3.5B (DLD-6)
		Experiment 1 (plotted)	Experiment 2
	Concentration (nM)	A450	A450
	125	2.4604	1.3645
	25	2.4945	1.2512
	5	2.3019	1.0508
	1	1.409	0.6667
	0.2	0.3314	0.2077
	0.04	0.1034	0.0993
	0	0.0794	0.0499
	U3+ 5.5A (DLD-7)
		Experiment 1 (plotted)	Experiment 2
	Concentration (nM)	A450	A450
	125	1.9339	0.6906
	25	1.8717	0.5466
	5	1.5641	0.492
	1	0.7096	0.2839
	0.2	0.1644	0.1053
	0.04	0.0846	0.0853
	0	0.0794	0.0468
	U3+ 5.8B (DLD-10)
		Experiment 1 (plotted)	Experiment 2
	Concentration (nM)	A450	A450
	125	2.1886	0.9238
	25	2.0892	0.8316
	5	1.8559	0.7191
	1	0.8666	0.3503
	0.2	0.1938	0.1286
	0.04	0.091	0.0817
	0	0.0794	0.0533
	U3 + 1.11E (DLD-12)
		Experiment 1 (plotted)	Experiment 2
	Concentration (nM)	A450	A450
	125	2.5865	1.3623
	25	2.5287	1.162
	5	1.9775	0.8091
	1	0.63	0.3013
	0.2	0.1415	0.1177
	0.04	0.0832	0.088
	0	0.0794	0.0541

## Sheet: Fig 5A
		VPI TcdB									M68 TcdB									UK1 TcdB
		DLD-4	% cell viability relative to naïve (CellTiterGlo)								DLD-4	% cell viability relative to naïve (CellTiterGlo)								DLD-4	% cell viability relative to naïve (CellTiterGlo)
			Experiment1		Experiment 2							Experiment1		Experiment 2							Experiment1		Experiment 2
		Conc	Rep 1	Rep 2	Rep 1	Rep 2	Average	stdev			Conc	Rep 1	Rep 2	Rep 1	Rep 2	Average	stdev			Conc	Rep 1	Rep 2	Rep 1	Rep 2	Average	stdev
		Naïve	100.456	99.5437	99.4503	100.55	100	0.583301			Naïve	99.7156	100.284	99.2682	100.732	100	0.641038			Naïve	97.5937	102.406	100.11	99.8901	100	1.96681
		25	103.511	98.8184	97.9827	98.1279	99.6099	2.6259			25	97.9405	99.2032	102.464	103.793	100.85	2.73523			25	7.38805	6.59553	9.0308	8.33943	7.83845	1.06777
		5	97.0351	100.096	96.515	97.598	97.8111	1.5864			5	90.7535	101.062	103.078	102.993	99.4716	5.8861			5	7.13997	7.25511	10.3233	8.29105	8.25235	1.47446
		1	100.962	102.253	99.1549	100.592	100.74	1.2743			1	100.598	102.832	104.337	103.249	102.754	1.5712			1	7.59459	6.6899	10.1781	8.30105	8.19091	1.47984
		0.2	97.0987	101.562	98.1631	102.102	99.7313	2.47387			0.2	94.4729	100.598	102.546	104.276	100.473	4.27325			0.2	7.82922	6.34468	9.07134	8.75863	8.00097	1.22373
		0.04	100.166	101.175	99.2602	102.125	100.681	1.24019			0.04	91.276	93.4621	100.647	103.249	97.1585	5.70174			0.04	7.16509	6.76527	8.96647	7.85941	7.68906	0.964144
		0.008	86.8141	88.3996	92.4707	94.4845	90.5422	3.5473			0.008	43.2377	50.3409	73.8073	82.0608	62.3617	18.5228			0.008	7.34967	6.352	7.49048	7.55103	7.18579	0.562226
		0.0016	30.9513	31.9293	31.9131	33.6737	32.1169	1.13415			0.0016	10.0072	11.2442	17.4068	19.8979	14.639	4.77127			0.0016	7.06914	6.2974	8.21429	7.75671	7.33438	0.836316
		0	11.0078	10.9333	14.6976	12.9135	12.388	1.79179			0	5.84578	6.0256	10.6363	10.0812	8.14721	2.56473			0	6.7445	6.47743	7.68806	7.51265	7.10566	0.585928
		DLD-7	% cell viability relative to naïve (CellTiterGlo)								DLD-7	% cell viability relative to naïve (CellTiterGlo)								DLD-7	% cell viability relative to naïve (CellTiterGlo)
			Experiment1		Experiment 2							Experiment1		Experiment 2							Experiment1		Experiment 2
		Conc	Rep 1	Rep 2	Rep 1	Rep 2	Average	stdev			Conc	Rep 1	Rep 2	Rep 1	Rep 2	Average	stdev			Conc	Rep 1	Rep 2	Rep 1	Rep 2	Average	stdev
		Naïve	100.456	99.5437	99.4503	100.55	100	0.583301			Naïve	99.7156	100.284	99.2682	100.732	100	0.641038			Naïve	97.5937	102.406	100.11	99.8901	100	1.96681
		25	99.6928	98.991	100.255	101.201	100.035	0.933797			25	96.8595	97.6973	105.12	105.211	101.222	4.56646			25	6.56744	6.62343	7.5067	9.31729	7.50371	1.2833
		5	101.678	101.327	101.021	102.861	101.722	0.805684			5	100.975	101.403	104.298	104.652	102.832	1.91065			5	6.7077	6.33123	8.7689	8.6216	7.60736	1.26698
		1	101.896	102.827	102.751	104.449	102.981	1.06563			1	105.112	105.407	104.526	105.237	105.071	0.382715			1	6.52906	6.77556	9.07512	8.67808	7.76446	1.29829
		0.2	100.865	101.411	101.856	104.139	102.068	1.43911			0.2	103.534	64.4873	104.693	106.416	94.7826	20.2316			0.2	6.6072	6.72828	8.91404	8.00266	7.56304	1.09983
		0.04	101.507	100.936	100.524	104.123	101.773	1.61793			0.04	98.6584	98.8383	98.4879	103.973	99.9894	2.65959			0.04	6.51877	7.12098	8.13969	8.19807	7.49438	0.817077
		0.008	90.0902	89.4958	79.8598	77.1096	84.1389	6.62909			0.008	40.2257	41.9236	50.057	50.7681	45.7436	5.44335			0.008	5.86494	6.49958	8.12564	7.98644	7.11915	1.11387
		0.0016	24.5628	27.977	21.5714	21.9582	24.0173	2.95516			0.0016	9.75023	10.1186	17.6736	15.8935	13.359	4.02337			0.0016	7.05747	6.62066	7.77482	8.97431	7.60681	1.02836
		0	11.0078	10.9333	14.6976	12.9135	12.388	1.79179			0	5.84578	6.0256	10.6363	10.0812	8.14721	2.56473			0	6.7445	6.47743	7.68806	7.51265	7.10566	0.585928
		DLD-11	% cell viability relative to naïve (CellTiterGlo)								DLD-11	% cell viability relative to naïve (CellTiterGlo)								DLD-11	% cell viability relative to naïve (CellTiterGlo)
			Experiment1		Experiment 2							Experiment1		Experiment 2							Experiment1		Experiment 2
		Conc	Rep 1	Rep 2	Rep 1	Rep 2	Average	stdev			Conc	Rep 1	Rep 2	Rep 1	Rep 2	Average	stdev			Conc	Rep 1	Rep 2	Rep 1	Rep 2	Average	stdev
		Naïve	100.456	99.5437	99.4503	100.55	100	0.583301			Naïve	99.7156	100.284	99.2682	100.732	100	0.641038			Naïve	97.5937	102.406	100.11	99.8901	100	1.96681
		25	98.4712	97.6185	101.305	101.596	99.7475	2.00021			25	91.9648	84.6661	104.43	105.295	96.5892	10.0138			25	8.07868	7.32751	4.45607	9.15188	7.25354	2.00963
		5	98.5002	100.538	102.135	103.637	101.203	2.20161			5	96.9693	98.1805	106.006	106.705	101.965	5.1015			5	6.48771	7.05747	8.86755	8.07509	7.62196	1.05861
		1	96.3695	97.424	102.681	102.737	99.803	3.38339			1	63.8518	69.8517	104.018	104.153	85.4687	21.6362			1	6.57931	6.66774	7.17183	7.65373	7.01815	0.497643
		0.2	44.8533	39.7247	66.623	66.684	54.4712	14.2218			0.2	15.6849	12.8511	40.4312	35.4424	26.1024	13.8645			0.2	6.51145	7.56808	7.88779	7.32318	7.32263	0.588121
		0.04	15.0839	15.9746	19.4569	16.9553	16.8677	1.88779			0.04	8.47217	9.43491	17.1792	13.9316	12.2545	4.05469			0.04	5.99036	6.7991	7.60941	7.07101	6.86747	0.674756
		0.008	15.2528	12.1315	15.9566	13.4433	14.1961	1.73638			0.008	6.59102	7.22649	13.4893	12.273	9.89495	3.49337			0.008	6.36229	6.20145	8.1478	7.69211	7.10091	0.966106
		0.0016	10.7787	11.7896	14.4748	12.6954	12.4346	1.56931			0.0016	6.40247	6.9594	11.8763	11.2347	9.11822	2.83562			0.0016	6.681	6.90692	7.71022	7.17804	7.11904	0.443415
		0	11.0078	10.9333	14.6976	12.9135	12.388	1.79179			0	5.84578	6.0256	10.6363	10.0812	8.14721	2.56473			0	6.7445	6.47743	7.68806	7.51265	7.10566	0.585928
		DLD-12	% cell viability relative to naïve (CellTiterGlo)								DLD-12	% cell viability relative to naïve (CellTiterGlo)								DLD-12	% cell viability relative to naïve (CellTiterGlo)
			Experiment1		Experiment 2							Experiment1		Experiment 2							Experiment1		Experiment 2
		Conc	Rep 1	Rep 2	Rep 1	Rep 2	Average	stdev			Conc	Rep 1	Rep 2	Rep 1	Rep 2	Average	stdev			Conc	Rep 1	Rep 2	Rep 1	Rep 2	Average	stdev
		Naïve	100.456	99.5437	99.4503	100.55	100	0.583301			Naïve	99.7156	100.284	99.2682	100.732	100	0.641038			Naïve	97.5937	102.406	100.11	99.8901	100	1.96681
		25	100.887	101.838	99.1571	100.7	100.646	1.11039			25	96.5237	97.5379	105.573	104.786	101.105	4.73366			25	5.44573	7.25075	7.26264	7.55508	6.87855	0.965526
		5	101.502	104.536	103.466	104.437	103.485	1.40758			5	102.018	102.587	105.564	106.039	104.052	2.04268			5	5.81627	6.42421	7.74644	7.64373	6.90766	0.943433
		1	103.571	102.822	104.357	104.456	103.801	0.763874			1	102.572	104.687	106.496	107.39	105.286	2.13051			1	5.47976	6.73857	7.43399	8.7789	7.1078	1.37669
		0.2	76.9734	103.251	104.831	104.212	97.3166	13.5777			0.2	99.3318	100.036	105.543	105.785	102.674	3.46597			0.2	5.33079	6.47881	7.33318	7.18993	6.58318	0.914699
		0.04	100.353	102.511	100.522	102.925	101.577	1.3292			0.04	82.6702	75.5911	103.268	103.429	91.2396	14.2779			0.04	5.88848	6.2058	7.684	7.49048	6.81719	0.902031
		0.008	72.3231	73.0503	85.5149	86.9684	79.4642	7.85399			0.008	16.706	21.8903	73.9268	71.0604	45.8959	30.8075			0.008	5.56245	6.66636	7.34129	7.9805	6.88765	1.03364
		0.0016	19.2087	18.8688	21.2643	23.2571	20.6497	2.03506			0.0016	6.1301	8.87132	15.1371	15.5707	11.4273	4.67344			0.0016	8.1776	7.01019	7.41994	6.88344	7.37279	0.583348
		0	11.0078	10.9333	14.6976	12.9135	12.388	1.79179			0	5.84578	6.0256	10.6363	10.0812	8.14721	2.56473			0	6.7445	6.47743	7.68806	7.51265	7.10566	0.585928
		Bezlotoxumab	% cell viability relative to naïve (CellTiterGlo)								Bezlotoxumab	% cell viability relative to naïve (CellTiterGlo)								Bezlotoxumab	% cell viability relative to naïve (CellTiterGlo)
			Experiment1		Experiment 2							Experiment1		Experiment 2							Experiment1		Experiment 2
		Conc	Rep 1	Rep 2	Rep 1	Rep 2	Average	stdev			Conc	Rep 1	Rep 2	Rep 1	Rep 2	Average	stdev			Conc	Rep 1	Rep 2	Rep 1	Rep 2	Average	stdev
		Naïve	100.456	99.5437	99.4503	100.55	100	0.583301			Naïve	99.7156	100.284	99.2682	100.732	100	0.641038			Naïve	97.5937	102.406	100.11	99.8901	100	1.96681
		25	99.3475	95.7805	99.802	99.143	98.5182	1.84583			25	99.2032	96.8303	103.535	103.704	100.818	3.37745			25	16.9839	20.4181	21.6609	25.2277	21.0727	3.40378
		5	92.5937	95.7605	95.685	94.2479	94.5718	1.49112			5	100.096	98.3723	103.622	101.001	100.773	2.19002			5	12.0945	10.8606	13.8417	14.5272	12.831	1.66569
		1	64.6311	66.42	55.7491	54.1247	60.2312	6.19244			1	97.4642	82.3121	102.93	101.174	95.9701	9.38606			1	8.22033	8.13625	10.4806	10.1279	9.24125	1.2363
		0.2	22.4358	23.7973	25.8643	22.2442	23.5854	1.66921			0.2	36.5663	30.916	47.4185	45.4109	40.0779	7.71571			0.2	6.74153	6.36229	7.54481	8.19023	7.20972	0.818745
		0.04	16.4964	13.873	17.3208	14.6976	15.5969	1.58762			0.04	12.4366	10.6565	20.3097	15.6639	14.7667	4.23689			0.04	7.1002	6.65745	7.53075	7.77887	7.26682	0.493607
		0.008	12.8641	11.3697	15.7759	12.393	13.1007	1.88941			0.008	7.3721	7.56915	13.7406	12.6459	10.3319	3.33503			0.008	6.54528	6.00955	7.78698	7.75049	7.02308	0.88848
		0.0016	11.1024	10.1407	16.6646	13.0002	12.727	2.88141			0.0016	6.61675	5.36073	11.9304	11.5468	8.86366	3.36269			0.0016	6.50255	6.30769	6.99236	6.93993	6.68563	0.33422
		0	11.0078	10.9333	14.6976	12.9135	12.388	1.79179			0	5.84578	6.0256	10.6363	10.0812	8.14721	2.56473			0	6.7445	6.47743	7.68806	7.51265	7.10566	0.585928
		a-GFP	% cell viability relative to naïve (CellTiterGlo)								a-GFP	% cell viability relative to naïve (CellTiterGlo)								a-GFP	% cell viability relative to naïve (CellTiterGlo)
			Experiment1		Experiment 2							Experiment1		Experiment 2							Experiment1		Experiment 2
		Conc	Rep 1	Rep 2	Rep 1	Rep 2	Average	stdev			Conc	Rep 1	Rep 2	Rep 1	Rep 2	Average	stdev			Conc	Rep 1	Rep 2	Rep 1	Rep 2	Average	stdev
		Naïve	100.456	99.5437	99.4503	100.55	100	0.583301			Naïve	99.7156	100.284	99.2682	100.732	100	0.641038			Naïve	97.5937	102.406	100.11	99.8901	100	1.96681
		25	11.4243	10.548	14.5945	13.3189	12.4714	1.82773			25	7.24188	6.06143	12.9516	11.1521	9.35176	3.23925			25	7.72891	7.06618	8.19618	8.19618	7.79686	0.534611
		5	12.0406	11.6351	14.3129	13.1196	12.7771	1.20037			5	8.2409	5.40712	15.6183	10.5755	9.96047	4.32356			5	6.75044	6.66774	7.2202	8.96242	7.4002	1.06952
		1	11.5695	10.768	13.558	13.0939	12.2474	1.30158			1	6.69207	5.22202	14.2004	10.1355	9.06251	3.99657			1	6.72986	6.74608	7.73238	7.98455	7.29822	0.655091
		0.2	9.76813	9.70794	14.3717	12.789	11.6592	2.31067			0.2	7.00901	5.36073	14.3565	10.7252	9.36285	4.01454			0.2	6.64855	6.45527	8.25267	9.63162	7.74703	1.4925
		0.04	10.6479	11.4496	12.8406	12.3273	11.8164	0.967798			0.04	6.41097	6.7674	12.5311	10.2916	9.00027	2.93396			0.04	6.89505	6.85074	7.94401	7.79482	7.37115	0.578838
		0.008	10.0898	11.9368	12.8406	12.4936	11.8402	1.22486			0.008	6.15237	5.52356	11.822	9.17506	8.16825	2.91099			0.008	6.70474	7.04263	7.63157	7.23642	7.15384	0.386913
		0.0016	10.2207	10.1061	12.4867	12.2896	11.2758	1.28782			0.0016	6.70402	4.61549	11.4276	9.7127	8.11496	3.04213			0.0016	6.16901	6.77398	7.25858	6.6437	6.71132	0.447996
		0	11.0078	10.9333	14.6976	12.9135	12.388	1.79179			0	5.84578	6.0256	10.6363	10.0812	8.14721	2.56473			0	6.7445	6.47743	7.68806	7.51265	7.10566	0.585928

## Sheet: Fig 5B
				Experiment 1		Experiment 2		Experiment 3		Experiment 4
			C diff Strain:	vpi 10463	M68	vpi 10463	M68	vpi 10463	M68	vpi 10463	M68
			DARPin	EC50 (nM)	EC50 (nM)	EC50 (nM)	EC50 (nM)	EC50 (nM)	EC50 (nM)	EC50 (nM)	EC50 (nM)
			DLD4	0.003	0.01	0.00562	0.02	0.0027	0.028	0.0027	0.0047
			DLD7	0.003	0.0098	0.0142	0.049	0.034	0.144	0.0048	0.0086
			DLD11	0.26	0.71	0.42	1.16	0.32	2.23	0.16	0.22
			DLD12	0.0053	0.021	0.00645	0.019	0.015	0.055	0.004	0.0057
			Bezlotoxumab	0.72	0.32	1.34	0.44	2.24	1.16	1	0.23
			C diff Strain:	VPI 10463 (087)		M68 (017)
			DARPin	Average EC50 (nM)	stdev	Average EC50 (nM)	stdev
			DLD4	0.003505	0.00141707	0.0193333	0.0090185
			DLD7	0.014	0.0142089	0.0676	0.0690064
			DLD11	0.29	0.108934	1.36667	0.78079
			DLD12	0.0076875	0.00497667	0.0316667	0.020232
			Bezlotoxumab	1.325	0.660581	0.5375	0.423822

[truncated: 22 more sheets: Fig 6A, Fig 6B, Fig 9A, Fig 9B, Fig 9C, Fig 10, S1 Fig, S2 Fig A B C, S3 Fig A, S3 Fig B, S4 Fig A, S4 Fig B, S5 Fig, S6 Fig, S13 Fig A B, S13 Fig C, S14 Fig A B, S17 Fig, S18 Fig A, S18 Fig B …]
